# Supplementary material
Source: PubMed Central journal article supplement (PMC3900303)
Supplement: NIHMS542597-supplement-08.pdf [file NIHMS542597-supplement-08.pdf]

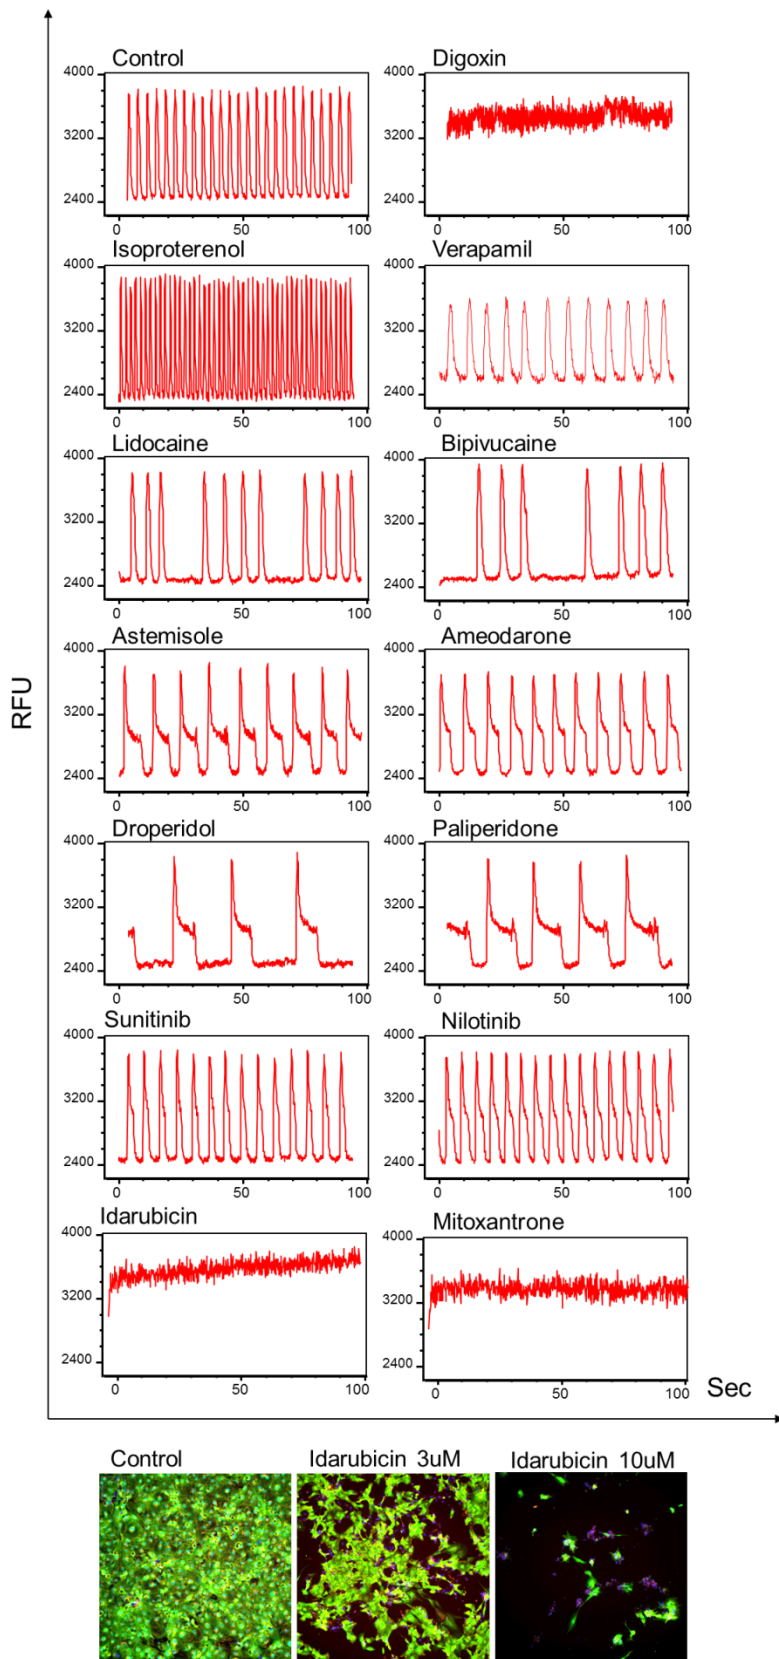

**Supplemental Figure 1.** Representative patterns of the effects of different compounds on iPSC-derived cardiomyocyte beating. Data for most compounds shown is at 3  $\mu$ M, with exceptions of lidocaine and bivuacaine (10 $\mu$ M) and astemisole (0.3  $\mu$ M), 30min exposure. Data for idarubicin and methotrexate were collected after 24hr of exposure, 3  $\mu$ M. Bottom panel, Images represent either control cells or cells after 24h treatment with idarubicin, 3 $\mu$ M and 10 $\mu$ M concentrations, and stained with viability, nuclear, and mitochondria dyes as described in Materials and Methods.
